# Supplementary material for: Vagus nerve stimulation as an add-on therapy in patients with epilepsy: A prospective, multicenter, real-world study in China
Source: Research Square preprint supplement (doi:10.21203/rs.3.rs-8136450/v1), 2025-12-01
Supplement: Supplementary file 1 [file 647742ee19cf2f4250281ca3.docx]

Table S1. Seizure outcomes, QOLIE-31 changes, and overall ASMs load changes at each visit after VNS implementation

|  | Baseline  N=124 | 1 month  N=124 | 3 months  N=113 | 6 months  N=98 | 9 months  N=81 | 12 months  N=64 |
| --- | --- | --- | --- | --- | --- | --- |
| **Seizure outcome N (%)** | | | | | | |
| Seizure free | 0 (0.0) | 3 (2.4) | 3 (2.7) | 9 (9.2) | 7 (8.6) | 7 (10.9) |
| 75% reduction | 0 (0.0) | 22 (17.7) | 23 (20.4) | 19 (19.4) | 22 (27.2) | 24 (37.5) |
| 50% reduction | 0 (0.0) | 19 (15.3) | 21 (18.6) | 33 (33.7) | 23 (28.4) | 18 (28.1) |
| 25% reduction | 0 (0.0) | 28 (22.6) | 35 (31.0) | 27 (27.6) | 17 (21.0) | 9 (14.1) |
| No change | 124 (100.0) | 50 (40.3) | 30 (26.6) | 10 (10.2) | 10 (12.4) | 5 (7.8) |
| Increase | 0 (0.0) | 2 (1.6) | 1 (0.9) | 0 (0.0) | 2 (2.5) | 1 (1.6) |
| *P* | - | <0.001* | <0.001* | <0.001* | <0.001* | <0.001* |
| **QOLIE-31 change** | | | | | | |
| QOLIE-31 | 53.4±16.3 | 56.3±15.8 | 58.7±15.7 | 59.5±15.7 | 60.1±16.4 | 61.0±15.8 |
| *P* | - | <0.001* | <0.001* | <0.001* | <0.001* | <0.001* |
| **Overall ASMs load change** | | | | | | |
| ASMs load | 1.57±1.02 | 1.70±1.39 | 1.75±1.58 | 1.73±1.42 | 1.80±1.52 | 1.84±1.66 |
| *P* | - | 0.333 | 0.443 | 0.169 | 0.056 | 0.072 |

QOLIE-31, 31-item Quality of Life in Epilepsy Inventory; ASMs, antiseizure medications * *P* < 0.05

Table S2 Comparisons of responder rate, seizure free rate, and QOLIE-31 changes between visits

|  | Responder rate  Statistical value (*P*) | Seizure free rate  Statistical value (*P*) | QOLIE-31 change  Statistical value (*P*) |
| --- | --- | --- | --- |
| 1 month vs 3 months | 2.88 (0.090) a | 0.00 (1.000) a | 4033 (<0.001) * b |
| 1 month vs 6 months | 21.1 (<0.001) * a | 4.50 (0.034) * a | 1634 (0.024) * b |
| 1 month vs 9 months | 18.2 (<0.001) * a | 3.57 (0.059) a | 870 (<0.001) * b |
| 1 month vs 12 months | 26.1 (<0.001) * a | 3.57 (0.059) a | 375 (<0.001) * b |
| 3 months vs 6 months | 18.2 (<0.001) * a | 6.00 (0.014) * a | 1722 (0.327)  b |
| 3 months vs 9 months | 13.5 (<0.001) * a | 3.57 (0.059) a | 850 (0.002) * b |
| 3 months vs 12 months | 23.1 (<0.001) * a | 6.00 (0.014) * a | 63.0 (<0.001) * c |
| 6 months vs 9 months | 0.250 (0.617) a | 0.667 (0.414) a | 658 (<0.001) * b |
| 6 months vs 12 months | 9.00 (0.003) * a | 5.00 (0.025) * a | 225 (<0.001) * b |
| 9 months vs 12 months | 8.00 (0.005) * a | 3.00 (0.083) a | 1. 0.001) * b |

QOLIE-31, 31-item Quality of Life in Epilepsy Inventory

a Chi-Square Test

b Wilcoxon signed-rank test

c Student’s paired t-test

* *P* < 0.05

Table S3. Correlations between the change of QOLIE-31 and the clinical variables

|  | **Clinical variables** | 1 month | |  | 3 months | |  | 6 months | |  | 9 months | |  | 12 months | |
| --- | --- | --- | --- | --- | --- | --- | --- | --- | --- | --- | --- | --- | --- | --- | --- |
| *r* | *P* valuea |  | *r* | *P* valuea |  | *r* | *P* valuea |  | *r* | *P* valuea |  | *r* | *P* valuea |
|  | Sexb | -0.057 | 0.444 |  | 0.021 | 0.787 |  | -0.068 | 0.414 |  | -0.039 | 0.669 |  | -0.022 | 0.835 |
|  | Age at VNS implantationb | 0.058 | 0.523 |  | -0.072 | 0.451 |  | -0.052 | 0.613 |  | -0.137 | 0.223 |  | -0.070 | 0.584 |
|  | Age at seizure onsetb | 0.065 | 0.473 |  | 0.107 | 0.261 |  | 0.048 | 0.644 |  | 0.023 | 0.836 |  | 0.075 | 0.558 |
|  | Epilepsy duration prior to VNSb | -0.021 | 0.818 |  | -0.140 | 0.146 |  | -0.036 | 0.728 |  | -0.139 | 0.222 |  | -0.123 | 0.341 |
|  | Seizure frequency before VNSb | 0.026 | 0.773 |  | 0.173 | 0.067 |  | 0.121 | 0.234 |  | 0.115 | 0.305 |  | 0.088 | 0.489 |
|  | Number of ASMs before VNSb | 0.088 | 0.333 |  | 0.243* | 0.010 |  | 0.137 | 0.178 |  | 0.015 | 0.891 |  | -0.063 | 0.618 |
|  | Overall ASM load prior to VNSb | 0.022 | 0.807 |  | 0.117 | 0.219 |  | 0.067 | 0.513 |  | -0.020 | 0.858 |  | -0.045 | 0.721 |
|  | Etiologyb | 0.047 | 0.603 |  | -0.018 | 0.850 |  | -0.011 | 0.916 |  | 0.035 | 0.755 |  | -0.012 | 0.927 |
|  | Seizure typesb | 0.106 | 0.239 |  | -0.050 | 0.600 |  | -0.011 | 0.913 |  | -0.011 | 0.924 |  | 0.005 | 0.966 |
|  | Comorbiditiesb | 0.102 | 0.258 |  | 0.131 | 0.167 |  | 0.048 | 0.636 |  | 0.041 | 0.715 |  | -0.102 | 0.421 |
|  | Responder at the last visitc | 0.141 | 0.056 |  | 0.167* | 0.031 |  | 0.168* | 0.044 |  | 0.200* | 0.030 |  | 0.242* | 0.019 |

a Statistical threshold was set at p<0.05, two tailed

b Spearman correlation

c Kendall’s tau-b correlation

* *P* < 0.05

QOLIE-31, 31-item Quality of Life in Epilepsy Inventory; VNS, vagus nerve stimulation; ASMs, antiseizure medications.
